# Supplementary material for: Application of 2D NMR Spectroscopy in Combination with Chemometric Tools for Classification of Natural Lignins
Source: MDPI journal article supplement (doi:10.3390/ijms241512403), 2023-08-03
Supplement: s1 [file s1]

## Application of 2D NMR Spectroscopy in Combination with Chemometric Tools for Classification of Natural Lignins

Anna V. Faleva \*, Ilya A. Grishanovich, Nikolay V. Ul'yanovskii and Dmitry S. Kosyakov \*

Laboratory of Natural Compounds Chemistry and Bioanalytics, Core Facility Center "Arktika", M.V. Lo-monosov Northern (Arctic) Federal University, Northern Dvina Emb. 17, 163002 Arkhangelsk, Russia; grilandr@gmail.com (I.A.G.); n.ulyanovsky@narfu.ru (N.V.U.)

\* Correspondence: a.bezumova@narfu.ru (A.V.F.); d.kosyakov@narfu.ru (D.S.K.)

### Contents:

**Figure S1.** Residual dispersion curves: PCA of all lignins (left); analysis of coniferous lignins (right)

**Figure S2.** A part of PC1 load plot in the form of a 2D NMR spectrum.

**Figure S3.** A part of PC2 load plot in the form of a 2D NMR spectrum.

**Figure S4.** A part of PC3 load plot in the form of a 2D NMR spectrum.

**Figure S5.** A part of PC4 load plot in the form of a 2D NMR spectrum.

**Figure S6.** A part of PC1 load plot of softwood lignin in the form of a 2D NMR spectrum.

**Figure S7.** A part of PC2 load plot of softwood lignin in the form of a 2D NMR spectrum.

**Figure S8.** A part of PC7 load plot of softwood lignin in the form of a 2D NMR spectrum.

**Table S1.** Data on the effect of substructures based on load spectra in the analysis of lignins isolated from coniferous wood species

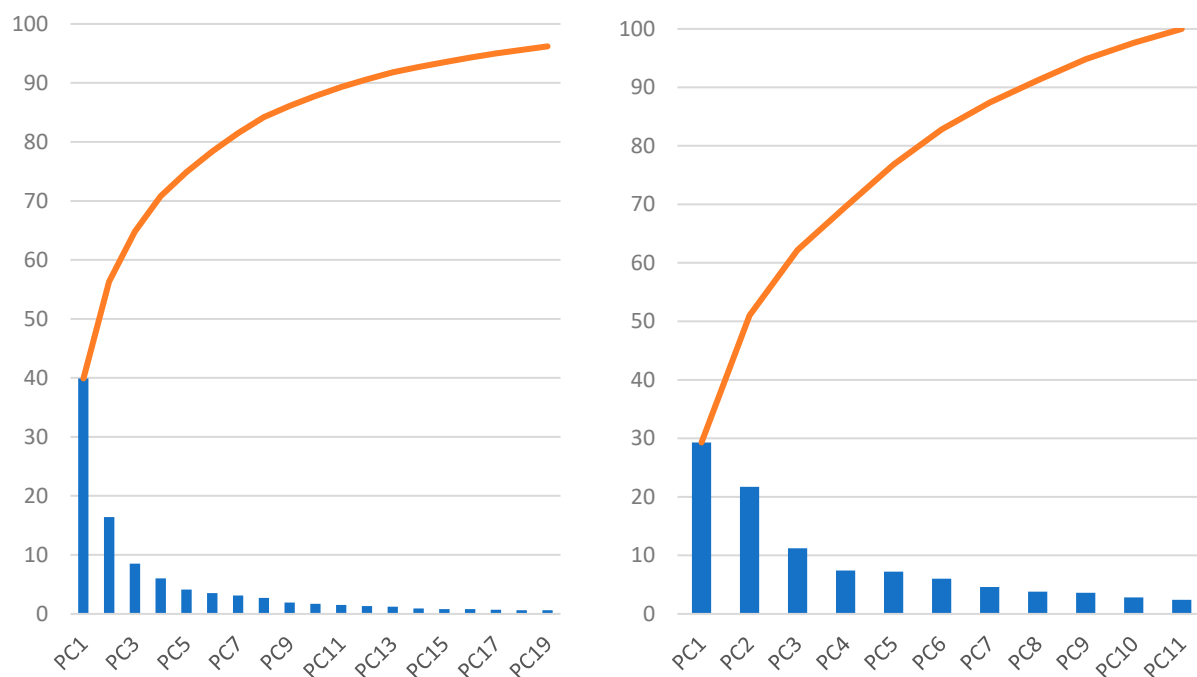

**Figure S1.** Residual dispersion curves: PCA of all lignins (left); analysis of coniferous lignins (right)

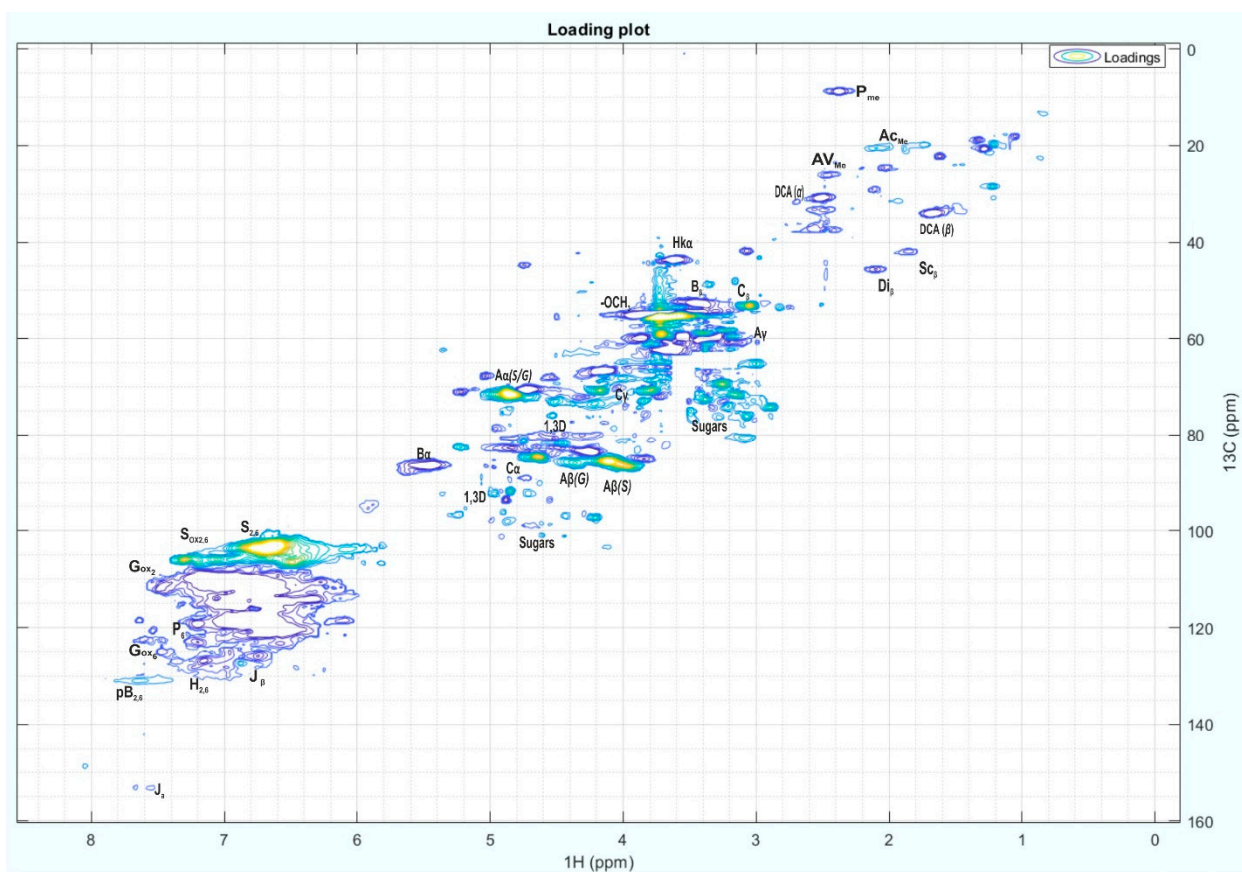

Positive cross-peaks (yellow) correlate with samples with positive values along PC1 and vice versa negative cross-peaks (blue) correlate with samples with a negative value along the PC1 axis

**Figure S2.** A part of PC1 load plot in the form of a 2D NMR spectrum.

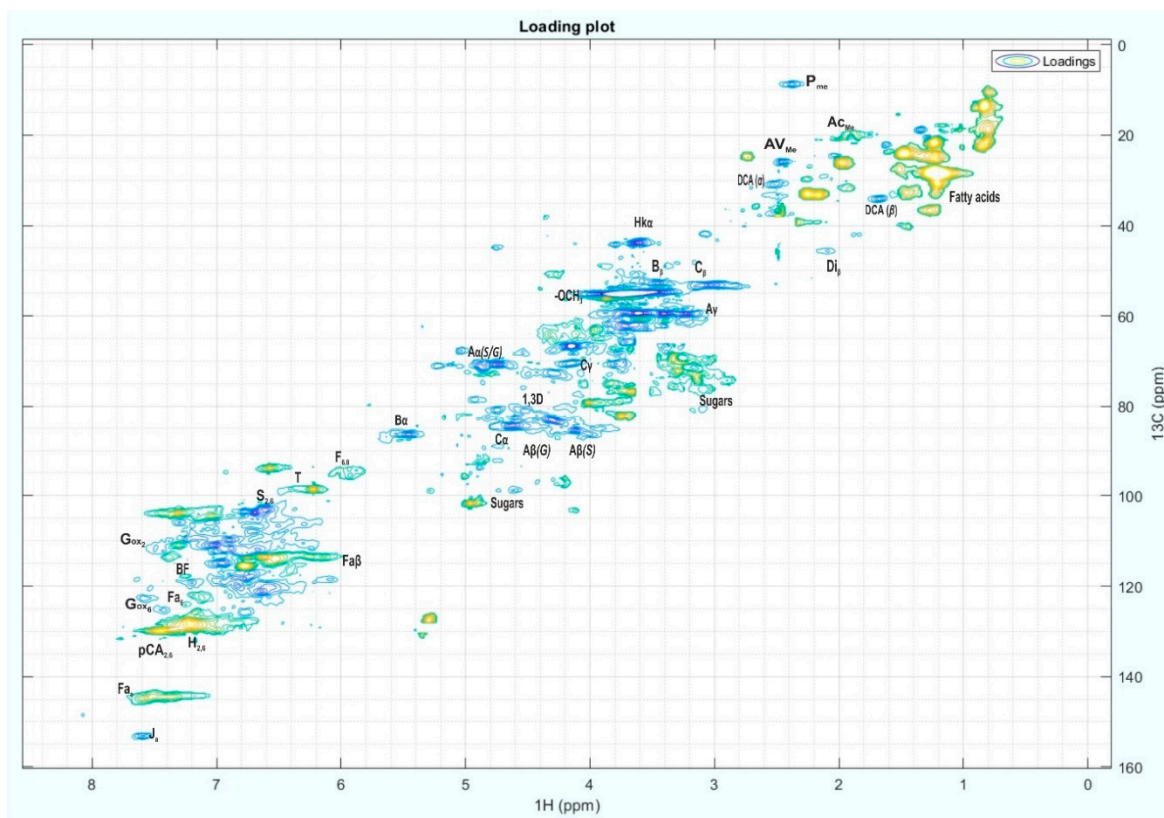

Positive cross-peaks (yellow) correlate with samples with positive values along PC2 and vice versa negative cross-peaks (blue) correlate with samples with a negative value along the PC2 axis

**Figure S3.** A part of PC2 load plot in the form of a 2D NMR spectrum.

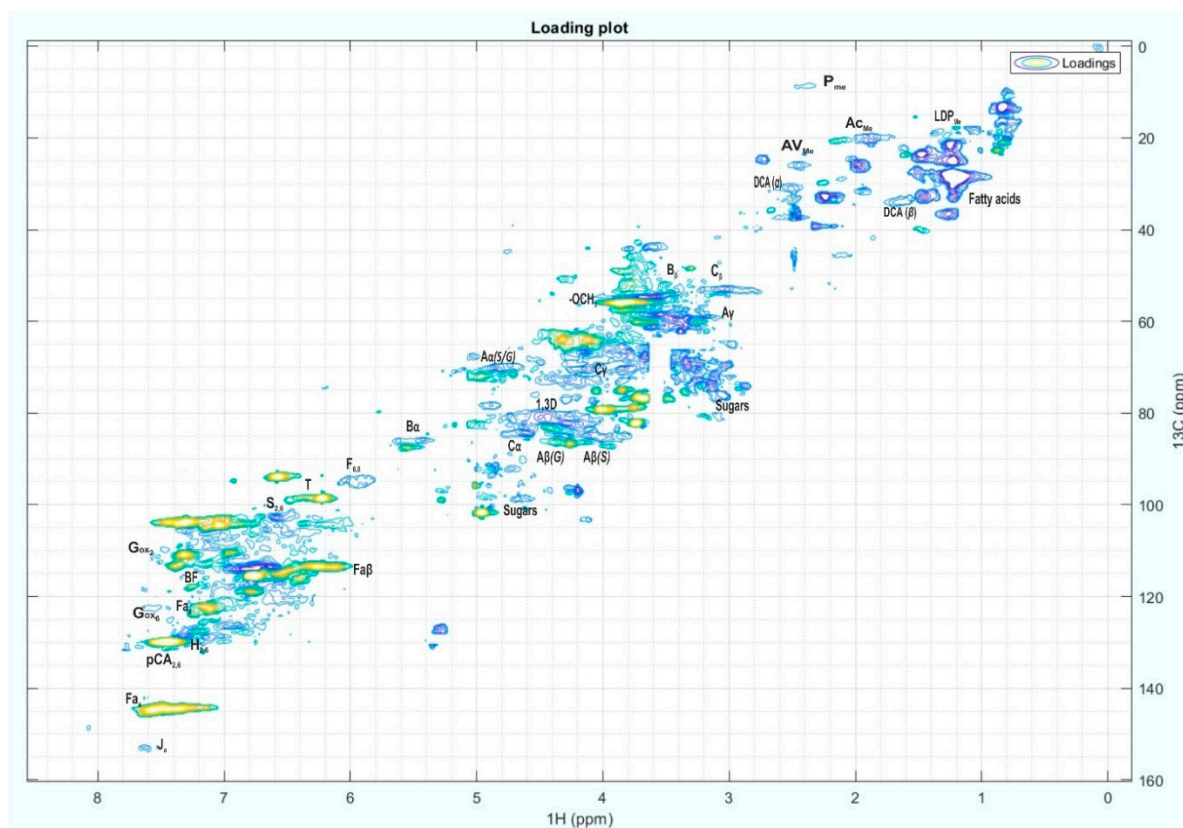

Positive cross-peaks (yellow) correlate with samples with positive values along PC3 and vice versa negative cross-peaks (blue) correlate with samples with a negative value along the PC3 axis

**Figure S4.** A part of PC3 load plot in the form of a 2D NMR spectrum.

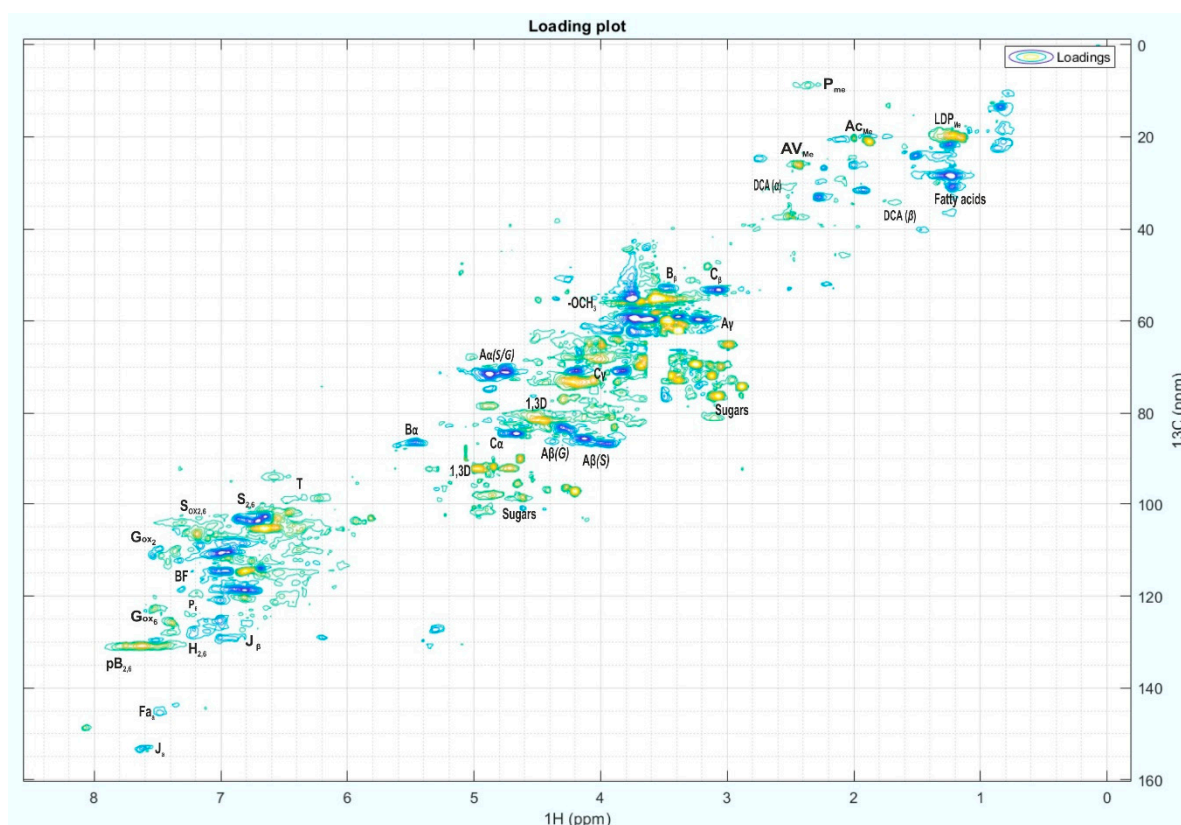

Positive cross-peaks (yellow) correlate with samples with positive values along PC4 and vice versa negative cross-peaks (blue) correlate with samples with a negative value along the PC4 axis

**Figure S5.** A part of PC4 load plot in the form of a 2D NMR spectrum.

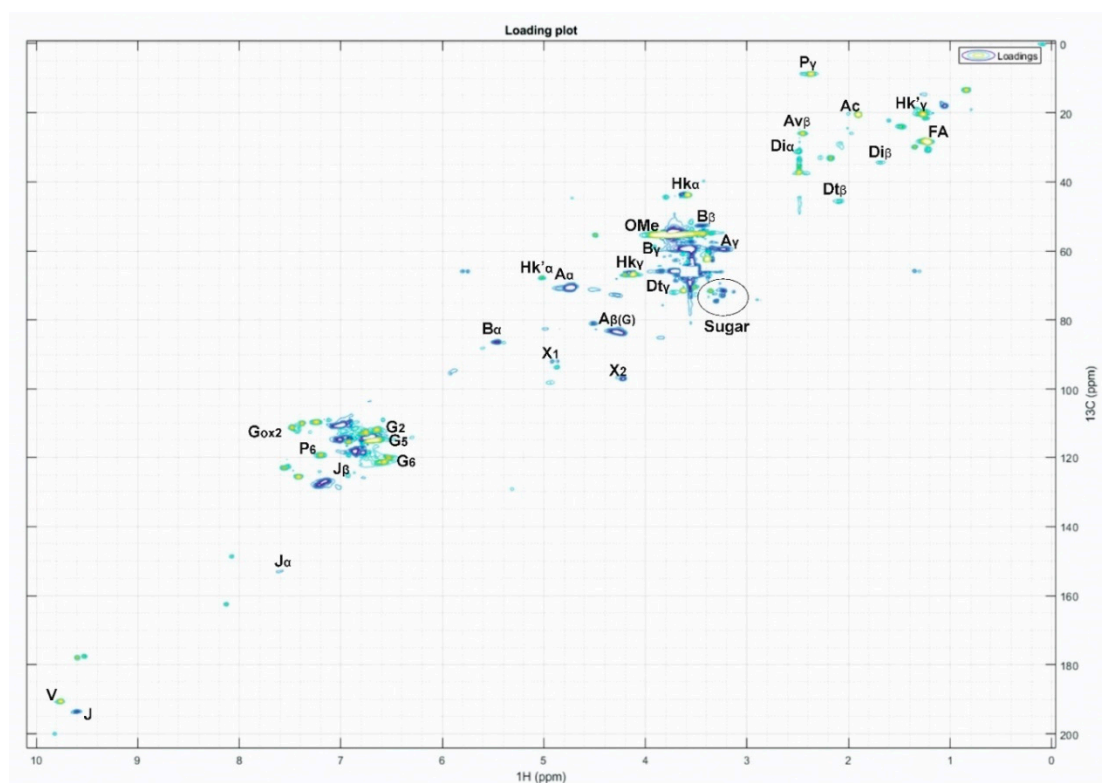

Positive cross-peaks (yellow) correlate with samples with positive values along PC1 and vice versa negative cross-peaks (blue) correlate with samples with a negative value along the PC1 axis

**Figure S6.** A part of PC1 load plot of softwood lignin in the form of a 2D NMR spectrum.





**Table S1.** Data on the effect of substructures based on load spectra in the analysis of lignins isolated from coniferous wood species

| Name of substructures                  | Label             | PC1     | PC2     | PC7    |
|----------------------------------------|-------------------|---------|---------|--------|
|                                        |                   | 29.3, % | 21.7, % | 4.6, % |
| Main substructures                     |                   |         |         |        |
| p-Hydroxyphenyl PPU                    | H                 | -       | +       | +      |
| Syringyl PPU                           | S                 | n/d     | n/d     | +      |
| β-aryl ether (G)                       | A                 | -       | -       | +      |
| Phenylcoumarone                        | B                 | -       | +/-     | +      |
| Secoisolariciresinol                   | Sc                | n/d     | -       | -      |
| Dibenzodioxocin                        | D                 | -       | -       | n/d    |
| Pinoresinol                            | C                 | n/d     | +       | n/d    |
| Dihydroconiferyl alcohol               | DCA               | +       | +/-     | n/d    |
| Coniferyl aldehyde                     | J                 | -       | -       | +      |
| Substructures formed during extraction |                   |         |         |        |
| methyl substituted phenylcoumarone     | P                 | +       | +       | -      |
| 3,4-divanylyltetrahydrofuran           | Di                | +       | n/d     | -      |
| Hibbert’s ketone                       | Hk                | +       | +       | +      |
| α- hydroxypropiovanilone               | Hk’               | +       | +       | -      |
| Acetovanillone                         | AV                | +       | +       | +      |
| Vanillin                               | V                 | +       | +       | -      |
| Other                                  |                   |         |         |        |
| Sugars                                 | Sugars            | -       | -       | +      |
| Fatty acids (+ Acetate)                | Fatty acids (+Ac) | +       | +       | +      |
| Taxifolin                              | F                 | -       | -       | -      |
